# Supplementary material
Source: Springer Nature journal article supplement (https://www.springermedizin.de/resource/supplementary/12885_2012_3920_MOESM4_ESM.pdf/9464782)

**A****Cell Viability**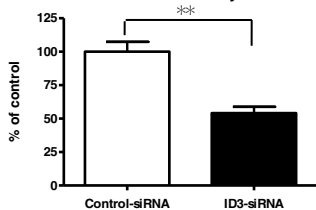**B****Proliferation**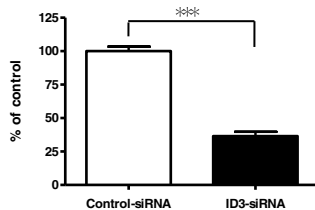**C**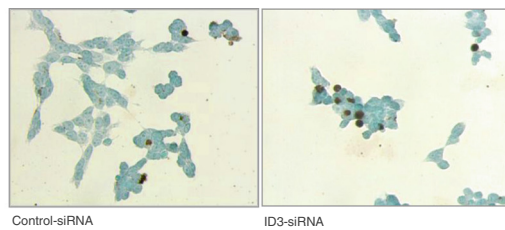**D****Apoptosis**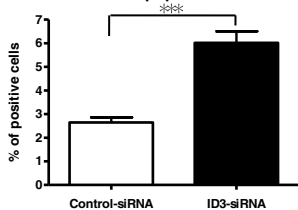**E****Senescence**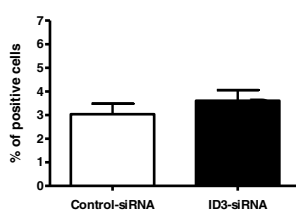**F**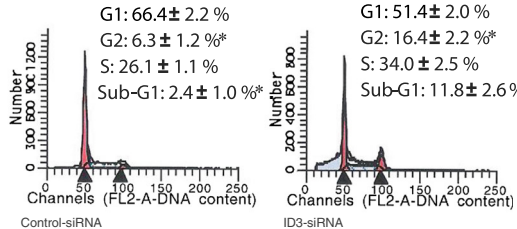**G**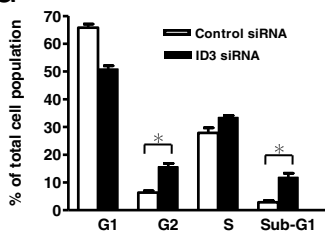**H**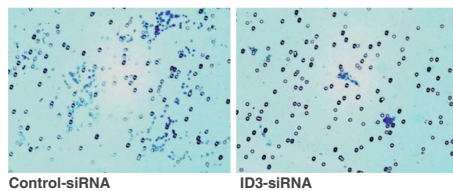**I**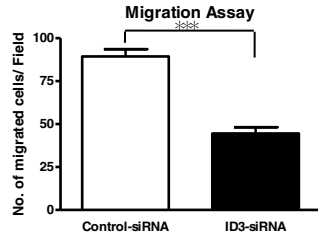

Supplement: MOESM4 [file 9464782]
